1 **Main title:**

2 High temperature cycles result in maternal transmission and dengue infection differences  
3 between *Wolbachia* strains in *Aedes aegypti*

4

5 **Authors:**

6 Maria Vittoria Mancini<sup>1</sup>, Thomas H. Ant<sup>1</sup>, Christie S. Herd<sup>1,2</sup>, Daniel D. Gingell<sup>1</sup>, Shivan M.

7 Murdochy<sup>1</sup>, Enock Mararo<sup>1,3</sup>, Steven P. Sinkins<sup>1</sup>

8

9 <sup>1</sup>MRC- University of Glasgow- Centre for Virus Research, Glasgow, UK

10 <sup>2</sup>Current address: Dept. of Veterinary Pathobiology, University of Missouri, Columbia, MO,

11 USA

12 <sup>3</sup>Current address: Ashworth Laboratories, King's Building, University of Edinburgh,

13 Edinburgh, UK

14

15 **Abstract**

16 Environmental factors play a crucial role in the population dynamics of arthropod  
17 endosymbionts, and therefore in the deployment of *Wolbachia* symbionts for the control of  
18 dengue arboviruses. The potential of *Wolbachia* to invade, persist and block virus transmission  
19 depends in part on its intracellular density. Several recent studies have highlighted the  
20 importance of larval rearing temperature in modulating *Wolbachia* densities in adults,  
21 suggesting that elevated temperatures can severely impact some strains, while having little  
22 effect on others. The effect of a replicated tropical heat cycle on *Wolbachia* density and levels  
23 of virus blocking was assessed using *Aedes aegypti* lines carrying strains *wMel* and *wAlbB*,  
24 two *Wolbachia* strains currently used for dengue control. Impacts on intracellular density,  
25 maternal transmission fidelity and dengue inhibition capacity were observed for *wMel*. In  
26 contrast *wAlbB*-carrying *Ae. aegypti* maintained a relatively constant intracellular density at  
27 high temperatures and conserved its capacity to inhibit dengue. Following larval heat treatment,  
28 *wMel* showed a degree of density recovery in aging adults, although this was compromised by  
29 elevated air temperatures. When choosing the *Wolbachia* strain to be used in a dengue control  
30 programme it is important to consider the effects of environmental temperatures on  
31 invasiveness and virus inhibition.

32

33 Keywords: *Wolbachia*, *Ae. aegypti*, dengue, environmental temperature, vector control

34

35 **Author summary**

36 In the past decades, dengue incidence has dramatically increased all over the world. An  
37 emerging dengue control strategy utilizes *Ae. aegypti* mosquitoes artificially transinfected with  
38 the bacterial symbiont *Wolbachia*, with the ultimate aim of replacing wild mosquito  
39 populations. *Wolbachia* is transmitted from mother to offspring and is able to interfere with

40 virus transmission within the mosquito vector. However, the rearing temperature of mosquito  
41 larvae is known to impact on some *Wolbachia* strains. In this study, we compared the effects  
42 of a temperature cycle mimicking natural breeding sites in tropical climates on two *Wolbachia*  
43 strains, currently used for open field trials. We observed that the strain *wMel* was susceptible  
44 to high larval rearing temperatures, while the strain *wAlbB* resulted to be more stable. These  
45 results underlines the importance of understanding the impact of environmental factors on  
46 released mosquitoes, in order to ensure the most efficient strategy for dengue control.

47

48

## 49 **Introduction**

50 *Wolbachia* comprises a diverse genus of maternally inherited bacterial endosymbionts that  
51 naturally infect arthropod species, but the major arbovirus mosquito vector *Aedes aegypti* is  
52 not a native *Wolbachia* host (1). *Wolbachia* facilitates its spread through host populations by  
53 increasing the relative fitness of carriers in various ways, including reproductive manipulations  
54 such as cytoplasmic incompatibility (CI). CI occurs when a *Wolbachia*-carrying male mates  
55 with a *Wolbachia*-free female, and results in reduced egg hatching. However, artificial transfers  
56 have been carried out in the laboratory with a range of *Wolbachia* strains, some of which induce  
57 strong CI and greatly reduce the competence of *Ae. aegypti* to transmit arboviruses, including  
58 Zika and dengue (2-7). An emerging dengue control strategy utilises CI to spread *Wolbachia*  
59 through wild mosquito populations, thereby reducing virus transmission. An increasing  
60 number of dengue-endemic countries are incorporating releases of *Wolbachia*-carrying *Ae.*  
61 *aegypti* as part of ongoing dengue control efforts. Open-field release programmes are currently  
62 underway in Indonesia, Vietnam, Australia and Malaysia, Colombia and Brazil, with  
63 significant reductions in dengue incidence reported (8-10). Several *Wolbachia* strains have  
64 been stably introduced into *Ae. aegypti*, with different strains generating distinct fitness and  
65 pathogen blocking profiles. In particular, the *Wolbachia* strains *wAlbB* and *wMel*, native to  
66 *Aedes albopictus* and *Drosophila melanogaster*, respectively, display promising characteristics  
67 in laboratory studies (2, 5, 7, 11, 12), and both are currently being deployed for dengue control.  
68 *wMel* belongs to the supergroup A *Wolbachia* clade. It provides protection from RNA viruses  
69 in its native host (13, 14), and blocks the transmission of dengue (DENV), chikungunya  
70 (CHIKV) and Zika (ZIKV) viruses in *Ae. aegypti* (2, 6, 15). The *wMel* infection has been  
71 successfully established in *Ae. aegypti* populations in the cities of Cairns and Townsville in  
72 northern Australia, and in Yogyakarta, Indonesia, with data indicating reductions in cases of  
73 locally acquired dengue (9, 10, 16, 17). *wAlbB* belongs to the supergroup B *Wolbachia* clade,

74 and also efficiently blocks DENV and ZIKV transmission in *Ae. aegypti* (3, 7, 18). Open-field  
75 releases of *wAlbB* in Kuala Lumpur, Malaysia, have resulted in high population frequencies  
76 and significant reductions in dengue incidence (8).

77 The magnitude of *Wolbachia*-mediated virus blocking shows a strong positive correlation with  
78 intracellular density (19, 20). Fitness costs also correlate with density, and the high density  
79 *wAu* and *wMelPop* strains cause both high fitness costs and strong viral inhibition (2, 7, 21,  
80 22), although there are some exceptions (7, 23). *wMel* and *wAlbB* reach comparable densities  
81 in female *Ae. aegypti*, and under standard laboratory conditions they show approximately  
82 equivalent levels of dengue (7, 11) and Zika blocking (7), and both have minimal effects on  
83 host fitness (2, 7, 24).

84 Invasiveness and stability of a *Wolbachia* strain depends primarily on CI induction capacity,  
85 maternal transmission efficiency and effects on host fitness. The likelihood that a female will  
86 mate with a *Wolbachia*-carrying male and incur the fitness cost of CI increases with *Wolbachia*  
87 frequency. The fitness advantage of CI is therefore frequency dependent, with invasiveness  
88 following bi-stable dynamics determined by an invasion threshold (25, 26). Above the  
89 threshold the fitness advantages of CI overcome other fitness costs and *Wolbachia* will tend to  
90 spread; below the threshold fitness costs dominate and *Wolbachia* will tend to be lost. The high  
91 density *wMelPop* strain induces strong CI, but results in fitness costs over a range of life history  
92 traits, including reductions in longevity and the survival of eggs following periods of desiccated  
93 quiescence. *wMelPop* carrying *Ae. aegypti* were released in field sites in Australia and Vietnam  
94 and despite reaching high initial infection frequencies, the strain was eventually lost once  
95 releases ceased (27).

96 Exposure of host insects to thermal stress is known to unbalance and perturb long-term  
97 symbiotic interactions and their phenotypes (28), and *Wolbachia* frequency in insect

98 populations can fluctuate seasonally and between geographical locations (29, 30). In  
99 mosquitoes, several recent studies have demonstrated an impact of larval rearing temperatures  
100 on *Wolbachia* density in the resulting adults, with results suggesting that elevated temperatures  
101 can significantly reduce the density of some strains (7, 31, 32). *wMel* appears to be particularly  
102 sensitive to high temperatures, with density dropping by several orders of magnitude when  
103 larvae are exposed to diurnal heat cycling between 27-37°C. In these experiments, a reduced  
104 capacity of male carriers to induce CI and a lower level of maternal transmission were  
105 observed, with eventual loss of the strain when high rearing temperatures were maintained for  
106 more than one generation (31). In contrast, *wAlbB* was found to be more stable at high  
107 temperatures, with little (7) or no (31) reduction in density.

108 Previous studies have investigated the effects of high larval rearing temperatures on *Wolbachia*  
109 density in whole mosquitoes, and have examined effects on the transmission fidelity (7, 31,  
110 32). However, reduced densities also suggest the potential for reduced virus blocking. Here,  
111 results are presented from a series of experiments examining the effects of simulated tropical  
112 temperatures on *Wolbachia* transmission and dengue blocking. Findings indicate that the *wMel*  
113 strain has both reduced maternal transmission and virus blocking capacity following larval  
114 rearing at high temperatures.

115

116

117

118

119

120

121

122

## 123 **Results**

### 124 *Effects of field-simulated temperature cycles on Wolbachia density*

125 Detailed temperature recordings from tropical *Ae. aegypti* larval breeding sites were obtained  
126 from a previously published study (33), and a replica-cycle (temp min: 28°C; max: 36°C,  
127 **Suppl. Fig. 1**) was generated in the laboratory using a programmable dynamic-temperature  
128 cabinet. Larvae from *wMel*- and *wAlbB*-carrying *Ae. aegypti* lines were reared under either  
129 simulated field temperatures, or control conditions (constant 27°C). On eclosion, adult  
130 mosquitoes from both treatments were maintained at a constant 27°C. 5-day-old adults were  
131 sacrificed, and *Wolbachia* densities assessed (**Fig. 1**). A subset of females were blood-fed, and  
132 the resulting progeny exposed to a second round of larval heat treatment, with *Wolbachia*  
133 densities in G1 adults assessed 5-days after emergence. Consistent with previous studies (7,  
134 31, 32), the *wMel* strain was particularly susceptible to density reductions resulting from high  
135 temperature rearing, with a significant drop in density from  $12.65 \pm 5.9$  *Wolbachia* per cell  
136 (mean  $\pm$  SD), to  $1.4 \pm 0.92$  *Wolbachia* per cell ( $p < 0.001$ , Mann-Whitney test) after one  
137 generation of heat treatment. The *wAlbB* strain maintained a relatively constant density over  
138 both generations of heat-treatment ( $p > 0.57$  for both generations, Mann-Whitney test).

139

### 140 *Effects of field-simulated temperature cycles on Wolbachia maternal transmission*

141 *Wolbachia*-carrying females reared under either the tropical high temperature larval  
142 temperature cycle or control conditions were back-crossed to wild-type males. Females were  
143 individualized for oviposition and the resulting G1 eggs hatched as single families. G1 larvae  
144 were reared at a constant 27°C until the L4 stage, whereupon a random selection from each  
145 family was assessed for *Wolbachia*-infection status and density. *wAlbB*-females resulting from  
146 larvae reared under either tropical high temperature or control conditions transmitted  
147 *Wolbachia* to 100% of offspring (N=60). Interestingly, the G1 progeny from heat-treated

148 *wAlbB* mothers tended to show higher *Wolbachia* densities compared to progeny resulting  
149 from mothers reared under control conditions; if the densities of larvae from each family are  
150 combined, the increase is significant ( $p < 0.001$ , Mann-Whitney test) (**Fig. 2A**). In contrast,  
151 maternal transmission of *wMel* was significantly reduced following larval heat treatment, with  
152 the complete loss of *wMel* in 3 of the 6 heat-treated families, compared to 100% transmission  
153 in the control group ( $p < 0.0001$ , Fisher's exact test) (**Fig. 2B**). *wMel* densities in the *Wolbachia*  
154 positive G1 progeny were significantly lower following heat treatment than densities in the G1  
155 progeny following control treatment ( $p = 0.002$ , Mann-Whitney test).

156 To correlate reductions in maternal transmission with *Wolbachia* densities in ovaries, females  
157 reared at either high or control larval temperatures were dissected, and ovary densities assessed  
158 by qPCR. *Wolbachia* was also visualized in ovaries by whole-mount fluorescent *in situ*  
159 hybridisation (FISH) (**Suppl. Fig. 2**). Results indicate that the high temperature-cycle caused  
160 significant reductions in the ovary density of *wMel*, while the density of *wAlbB* was not  
161 negatively affected by the high temperature cycle, and even increased ( $p = 0.002$ , Mann Whitney  
162 Test), compared to controls following two generations of treatment (**Fig. 2C**).

163

#### 164 *Effects of field-simulated temperature cycles on virus transmission*

165 To test whether temperature-induced reductions in *Wolbachia* density could impact dengue  
166 inhibition, larvae from the *wAlbB*, *wMel* and wild-type lines were reared under either high-  
167 temperature or control conditions, and the resulting adult females were orally challenged with  
168 a bloodmeal containing DENV-2. 12 days post-feeding, levels of infectious virus in dissected  
169 heads and thoraxes, and salivary glands, were quantified to assess the infection rate and  
170 transmission potential within the vector.

171 Increasing the larval rearing temperature had no significant effect on the infection rate in head  
172 and thoraxes of wild- type females - 8 out of 24 for the control group and 14 out of 24 for the



173 heat treated cohort ( $p=0.14$ , Fisher's exact Test). A slight, although non-significant, increase  
174 in viral titres was observed between the groups ( $p=0.05$ , Mann-Whitney Test). In contrast,  
175 *wMel* females reared at high temperature displayed a significant increase in infection rate in  
176 heads and thoraxes (**Fig. 3D**, 8 out of 24 were positive for virus, 33.3%) compared to *wMel*  
177 females reared under control conditions (**Fig. 3B**, 1 out of 24 were positive for virus, 4.2%)  
178 ( $p<0.05$ ; Fisher's Exact Test). While *wMel* females reared under control conditions had a  
179 significantly reduced infection rate ( $p=0.02$ , Fisher's Exact Test) compared to wild-type  
180 females, this decrease was not observed when *wMel* larvae were reared at high temperature  
181 ( $p=0.14$ , Fisher's Exact Test). However, *wMel* caused a significant reduction in viral titre in  
182 heads and thoraxes compared to wild-type *Ae. aegypti*, regardless of larval rearing temperature  
183 ( $p= 0.003$  for control and  $p=0.03$  for heat treated *wMel*, respectively; Mann-Whitney Test),  
184 although viral titres were significantly higher in *wMel* females when larvae were reared at high-  
185 compared with control temperature ( $p=0.01$ , Mann-Whitney) (**Fig. 3A and C**). Moreover, no  
186 significant difference in the viral titer in salivary gland tissue was observed in heat-treated  
187 *wMel* compared to wild-type females ( $p=0.27$ , Mann-Whitney Test) (**Fig. 3E**).

188 *wAlbB* maintained strong viral inhibition following high-temperature rearing, with no  
189 significant difference in DENV-2 infection rate in heads and thoraxes in control-reared (0 out  
190 of 24 positive for virus) and high-temperature-reared *wAlbB* females (3 out of 24 positive for  
191 virus, 12.5%) ( $p=0.238$ , Fisher's Exact Test). Regardless of larval rearing temperature, *wAlbB*  
192 consistently reduced the infection rate (control:  $p=0.003$ , Fisher's Exact Test; high-  
193 temperature:  $p=0.002$ , Mann-Whitney) and titre of DENV-2 in heads and thoraxes compared  
194 to wild-type females (control:  $p=0.003$ , Fisher's Exact Test; high-temperature:  $p<0.001$ , Mann  
195 Whitney Test). Moreover, viral titres in salivary gland tissue were significantly lower in high-  
196 temperature-reared *wAlbB* females compared to wild-type females ( $p<0.01$ , Mann-Whitney  
197 Test) (**Fig. 3C and E**). Viral infection rate and titre were significantly higher in the salivary

198 glands of heat treated *wMel* females compared to *wAlbB*-carrying mosquitoes reared at similar  
199 high temperatures ( $p=0.0001$ , Fisher's Exact Test;  $p<0.0001$ , Mann-Whitney Test), while no  
200 significant difference was observed in heads and thoraxes of control and heat treated females  
201 from the two *Wolbachia* strains.

202

### 203 *Adult exposure to elevated temperatures and Wolbachia recovery*

204 A previous study reported substantial recovery of *wMel* in adult *Ae. aegypti* from initially low  
205 densities following larval rearing at high temperatures (32). To further investigate density  
206 recovery in adults, and to examine the impact of elevated air temperatures on recovery rates,  
207 *wMel* and *wAlbB* larvae were reared under control or high temperature conditions, with  
208 emerging adults exposed to replica heat cycles generated from recordings of ambient  
209 temperatures in shaded (temp min: 28°C; max: 33.5°C) or semi-shaded (temp min: 27°C; max:  
210 36.5°C) sites in urban Kuala Lumpur (**Suppl. Fig. 1**). Adult females were dissected, and  
211 *Wolbachia* densities in midgut and salivary gland tissues were also assessed.

212 There was a significant reduction in the density of *wMel* in adults emerging from the high  
213 temperature cycle ( $0.025 \pm 0.015$  *Wolbachia* per cell, mean  $\pm$  SD) compared to larval-control  
214 treatments ( $2.8 \pm 2.6$  *Wolbachia* per cell) ( $p < 0.001$ , Mann-Whitney Test). However, there was  
215 a marked recovery in density in heat-treated larvae subsequently reared under control  
216 conditions as adults (reaching  $0.495 \pm 0.435$  *Wolbachia* per cell after 14 days), although this  
217 recovery was incomplete – with adults from control larvae maintaining a significantly higher  
218 density,  $5.975 \pm 3.73$  *Wolbachia* per cell after 14 days ( $p = 0.003$ , Mann-Whitney Test). Air  
219 temperature had a significant impact on the recovery of *wMel*, with 14-day-old females from  
220 the shaded and semi-shaded cycles displaying significantly lower densities than adults reared  
221 at control temperatures ( $p < 0.001$  for both shaded and semi-shaded, Mann-Whitney test).

222 A similar trend was observed in dissected salivary gland and midgut tissues of emerging adults,  
223 with significant reductions in *wMel* density in both tissues following larval heat treatment ( $p$   
224  $<0.005$  for both midguts and salivary glands, Mann-Whitney test). There was a recovery in  
225 density in midguts at day-14 in the larval-heat cohort reared at the control adult temperature,  
226 with no significant difference compared to mosquitoes reared exclusively under control  
227 conditions ( $p =0.48$ , Mann-Whitney test). Densities in the salivary glands of females reared  
228 under larval-heat showed minimal recovery at both control and shaded adult treatments, with  
229 significantly lower densities compared to mosquitoes reared exclusively under control  
230 conditions ( $p <0.005$  for both control and shaded, Mann-Whitney test). Adults reared under the  
231 semi-shaded heat cycle showed significant reductions in density in both salivary gland and  
232 midgut tissues compared to adults reared at control temperatures ( $p <0.005$  for both salivary  
233 glands and midguts, Mann-Whitney test).

234 *wAlbB* showed a reduction in density in adults emerging from larval-heat ( $0.46 \pm 0.2$   
235 *Wolbachia* per cell) compared to larval-control treatments ( $1.65 \pm 0.41$  *Wolbachia* per cell) ( $p$   
236  $<0.001$ , Mann-Whitney test). However, the density recovered fully after 7-days of adult rearing  
237 under control conditions, with no significant reduction in density compared to mosquitoes  
238 reared only at control temperatures ( $p=0.002$ , Mann-Whitney test). Interestingly, *wAlbB*-  
239 carriers reared at the control temperature as larvae and the shaded temperature cycle as adults  
240 showed significantly increased *Wolbachia* densities compared to adults reared only under  
241 control conditions ( $p =0.002$ , Mann-Whitney test). The semi-shaded adult treatment resulted  
242 in significant reductions in densities compared to adults reared at the control temperature,  
243 regardless of larval treatment ( $p <0.001$  for both control and heat-treated, Mann-Whitney test).

244 Following larval heat treatment, the density of *wAlbB* in both midgut and salivary gland tissues  
245 of eclosing adults was slightly but significantly reduced ( $p =0.02$  for salivary glands;  $p =0.002$

246 for midguts). However, densities in both tissues recovered fully at day-14 when adults were  
247 reared under either control or shaded temperature conditions, displaying no significant  
248 reductions compared to tissue densities in adults reared under control conditions only ( $p > 0.18$   
249 for all comparisons). Similar to *wMel*, rearing *wAlbB* adults under semi-shaded conditions  
250 resulted in significant reductions in densities compared to adults reared under control  
251 conditions, regardless of larval treatment.

## 252 **Discussion**

253 *Ae. aegypti* larvae developing in the tropics encounter a far broader and variable range of  
254 temperatures than those typically used in mosquito insectaries (usually stringently maintained  
255 in the range of 27-28°C). Several recent studies have highlighted the substantial influence that  
256 larval water temperature has in determining the density of some *Wolbachia* strains in *Ae.*  
257 *aegypti*, particularly *wMel* (31, 32, 34). This is noteworthy as *Wolbachia* strain characterisation  
258 is routinely performed under standard insectary temperatures and suggests that phenotypes  
259 predicted by laboratory tests may vary in the field. Tropical breeding sites can experience  
260 heating above 30°C for extended periods of the day, and in some cases reach daily maxima in  
261 excess of 36°C (33, 35). The high temperature regime used in this study was generated from  
262 data collected from water drums in Trinidad acting as *Ae. aegypti* larval habitats (33).

263 Consistent with previous studies, *wMel* was found to be negatively affected by exposure to the  
264 high temperature cycle, showing a significant decrease in whole body density. A substantial  
265 drop in adult ovary density was also observed, leading to a reduction in maternal transmission  
266 of approximately 75%. Imperfect maternal transmission can impact the population stability of  
267 a *Wolbachia* infection by increasing invasive threshold, potentially compromising the ability  
268 of *wMel* to spread and persist in wild populations. Previous evidence documented a disruption  
269 in *wMel* maternal transmission and CI induction following exposure to high temperatures (31).

270 Additionally, intense artificial laboratory selection for a heat resistant *wMel* variant in *Ae.*  
271 *aegypti* failed to produce a strain with improved thermal tolerance, an observation that was  
272 supported by experiments showing that field collected *wMel*-carriers from a hot climate did  
273 not differ substantially in their response to heat stress compared to a laboratory colony –  
274 suggesting that adaption of the strain to high temperatures may be intrinsically difficult (34).  
275 In contrast, the *wAlbB* strain showed relative heat stability when larvae were reared under the  
276 high temperature regime. High densities were maintained in the ovaries, resulting in complete  
277 maternal transmission, suggesting that the *wAlbB* strain would be more stable in hot tropical  
278 climates.

279 For the first time, the consequences of tropical heat stress on the ability of *Wolbachia* to inhibit  
280 dengue virus dissemination was tested in *wMel* and *wAlbB*-carrying *Ae. aegypti*. Rates of  
281 mosquito infection to salivary glands following challenge with DENV2 were quantified in  
282 order to predict the infective state of mosquitoes reared under either high temperature or control  
283 conditions. Following exposure to thermal stress, *wAlbB* retained its ability to efficiently block  
284 DENV2 dissemination, while *wMel* showed a significant increase in viral dissemination.  
285 *Wolbachia*-mediated viral inhibition is thought to be primarily cell autonomous (5, 36);  
286 consequently, densities in midgut and salivary gland tissues are key to blocking virus  
287 dissemination and transmission. The reduction in dengue inhibition in heat-treated *wMel* is  
288 concomitant with large reductions in *Wolbachia* density in both midgut and salivary gland  
289 tissues, although the density in midguts appeared to recover in adults after 14-days. *wAlbB*  
290 also showed reductions in density in midgut and salivary gland tissues, although the reduction  
291 was not as dramatic as *wMel*, and recovered fully in 14-day old adults.

292 A decrease in the efficiency of dengue blocking by *wMel* could have significant impacts on the  
293 utility of the strain as a vector control intervention in hot tropical climates. This is particularly

294 relevant given the role of high temperatures as a covariate of dengue transmission (37).  
295 Moreover, there is the potential that a weakening of the *wMel* transmission blocking phenotype  
296 following exposure to high temperatures could increase the risk of selection of virus escape  
297 mutations that confer a lower general susceptibility to *Wolbachia*-mediated inhibition – and  
298 could therefore undermine *Wolbachia* interventions. *Wolbachia* at high density induce a broad  
299 range of perturbations in *Ae. aegypti* cells (38), including in a number of pathways that are  
300 important in the flavivirus life cycle – such as lipid transport and metabolism, autophagy,  
301 vesicular trafficking and endoplasmic reticulum stress; this is inherently likely to reduce the  
302 risk of selection of virus escape mutations; however, at lower density the levels of perturbation  
303 are reduced (38).

304 A previous study has shown that initially low densities of *wMel* following larval heat-treatment  
305 can recover substantially in adults reared under normal insectary conditions (32). Results  
306 presented here are consistent with this finding, with *wMel* showing considerable (although  
307 incomplete) density recovery when adults are reared at a constant 27°C. However, while adult  
308 mosquitoes are able to fly and seek cooler resting areas, ambient air temperatures are often  
309 very high in the tropics. Recordings in shaded and semi-shaded sites from urban Kuala Lumpur  
310 indicate that air temperatures can reach in excess of 34°C for several hours of the day. In larvae  
311 carrying *wMel* reared using the high temperature cycle, and subsequently reared as adults using  
312 a replica shaded air-temperature cycle, only a limited recovery in *Wolbachia* density occurred.  
313 In contrast, the density of *wAlbB* in whole mosquitoes reared as adults using the shaded  
314 temperature cycle were significantly higher than controls – suggesting that the temperature  
315 optimal for *wAlbB* replication may actually be higher than the 27°C used in standard rearing.  
316 Both *wMel* and *wAlbB* densities were substantially reduced by exposure to semi-shaded  
317 equivalent air temperatures, suggesting that *wAlbB* is not completely resistant to the effects of  
318 high temperatures, although this cycle represents an extreme temperature regime that adult

319 mosquitoes will be unlikely to encounter for extended periods. The *wAlbB* strain was capable  
320 of reaching and maintaining high frequencies and significantly reducing dengue transmission  
321 in the hot tropical climate of urban Kuala Lumpur, Malaysia (8).

322 Although *wMel* shows reduced densities in the laboratory using simulated field conditions,  
323 releases in Australia, Brazil and Indonesia demonstrate that *wMel* can stably invade wild *Ae.*  
324 *aegypti* populations (9, 10, 16, 39, 40) and maintain its ability to block dengue (17, 41). In  
325 direct comparisons the *wMel* line produced slightly lower fitness costs than *wAlbB* (7),  
326 suggesting that it may be the more invasive of the two strains in cooler climates. Exposure of  
327 *wMel*-carrying *Ae. aegypti* adults to a diurnal temperature cycle with a mean of 28°C and a  
328 fluctuating range of 8°C ( $\pm 4^\circ\text{C}$ ) caused a decrease in bacterial density when compared to  
329 constant 25°C, but did not reduce the ability of *Wolbachia* to inhibit dengue transmission (42).  
330 Moreover, in some hotter equatorial areas *Ae. aegypti* can exploit underground larval habitats,  
331 such as wells and drains, which will be away from direct sun light and cooler than ground level.  
332 Laboratory experiments have also proved that the effects of thermal stress on *Wolbachia*  
333 density are stage-specific (43); in particular, exposure of early larval stage generates a  
334 significant and irreversible decrease in density, while the drop observed during exposure to  
335 later stages is rescued during adulthood. This suggests that the variations in temperature typical  
336 of the field will result in a more complex gradient of phenotypes, less clear-cut than those  
337 produced in the laboratory. The complex interactions between environmental temperatures and  
338 *Wolbachia* phenotypes has been recently investigated in natural *Wolbachia-Drosophila*  
339 associations, where the developmental temperature of the host modulated *Wolbachia*-induced  
340 antiviral effects, ranging from complete to no protection, although without affecting its density  
341 (44).

342 Our data show that high tropical temperatures have a significant impact on the phenotypic  
343 stability of *Wolbachia* in *Ae. aegypti*, and the magnitude of this impact varies substantially  
344 between *Wolbachia* strains. Of the strains currently used in open field releases, *wMel* appears  
345 to be particularly susceptible and *wAlbB* relatively stable under thermal stress, with *wMel*  
346 displaying a marked reduction in capacity for maternal transmission and dengue blocking -  
347 which is not observed with *wAlbB*. The selection for the optimal strain for *Wolbachia*-deployed  
348 vector control strategies must therefore consider phenotypic stability in relation to the  
349 geography and climate of selected intervention areas. The water temperature of natural  
350 breeding sites not only represents a crucial abiotic factor known to directly affect vector  
351 biology (45), but it also plays a role in ensuring the most effective *Wolbachia*-based strategy  
352 for reducing dengue transmission.

## 353 **Methods**

### 354 Mosquito rearing

355 *wMel*, *wAlbB* and wild-type *Ae. aegypti* mosquitoes were derived from previously generated  
356 lines (7). Colonies were maintained at 27°C and 70% relative humidity with a 12-hour  
357 light/dark cycle. Larvae were fed with tropical fish pellets (Tetramin, Tetra, Melle, Germany)  
358 and adults maintained with 5% sucrose solution *ad libitum*. Blood meals were provided using  
359 an artificial blood-feeding system (Hemotek, UK) using human blood (Scottish National Blood  
360 Transfusion Service, UK). Eggs were collected on a wet filter-paper (Grade 1 filter paper,  
361 Whatman plc, GE healthcare, UK). Eggs were desiccated for 5 days and later hatched in  
362 deionized water containing 1g/L bovine liver powder (MP Biomedicals, Santa Ana, California,  
363 USA).

364

### 365 Temperature cycles



366 For each replicate, eggs from *wMel*, *wAlbB* and wild-type (WT) *Ae. aegypti* lines were hatched  
367 and separated into experimental groups: larval density (200 larvae per 500 mL of water) and  
368 food were consistent between the conditions. Data shown in the plots are the representation of  
369 one of three independent biological replicates, consistently showing the same trend of results.  
370 Heat-challenged larvae were maintained in Panasonic MLR-352-H Plant Growth Chamber  
371 incubator (Panasonic, Osaka, Japan). The applied temperature regime was based on data from  
372 *Ae. aegypti* larval breeding containers in Trinidad (33) and replicated in the cabinets. Water  
373 temperatures were continuously monitored using a data logger (Hobo Water Temperature Pro  
374 V2, Bourne, MA, USA) placed in a plastic tray filled with 500 ml of water. Temperature data  
375 were registered and monitored. Mosquitoes under control conditions were stably maintained at  
376 27°C, as previously described.

377 Pupae were sexed according to size, introduced into cages and maintained during the adult  
378 stage at 27°C, unless otherwise stated.

379 For assessing *Wolbachia* recovery during the adult stage, females from control and heat-treated  
380 groups were selected and divided into three different adult treatments: i) C: control (27°C  
381 constant), ii) S: shaded (temperature peak at 32°C) and iii) S/S: semi-shaded (temperature peak  
382 at 37°C). Adults temperature cycles are based on air temperature readings registered in Kuala  
383 Lumpur in February 2019. Readings for the shaded cycle (S) were collected in the area of Pusat  
384 Komersial Shah Alam (3°03'57.2"N 101°29'24.0"E), and in the area of the Institute of Medical  
385 Research (3°10'10.3"N 101°41'55.0"E) for the semi-shaded cycle (S/S).

386

### 387 *Wolbachia* density and Fluorescent In Situ Hybridization (FISH)

388 Genomic DNA from 5-7-days old (unless otherwise stated) whole females and males of  
389 *Wolbachia*-carrying lines was extracted with STE buffer (10uM Tris HCL pH 8, 100mm NaCl,  
390 1mm EDTA) and used for *Wolbachia* density quantification by qPCR using the relative

391 quantification of the *Wolbachia* surface protein (*wsp*) gene against the homothorax gene (HTH)  
392 as reference gene. The following program was used to run the qPCRs: 95 °C for 5 min, 40×  
393 cycles of 95 °C for 15 s and 60 °C for 30 s, followed by a melt-curve analysis. A Rotor Gene  
394 Q (Qiagen) was used with 2x QuantiNova SYBR.

395 Ovaries, salivary glands and midguts (6 pools of 3 organs per each replicate) were dissected  
396 from 5-days old females using sterile forceps and needles in a drop of sterile PBS buffer, and  
397 immediately transferred into tubes containing STE buffer; genomic DNA from tissues was  
398 extracted and *Wolbachia* density was assessed by qPCR as previously described.

399 At the same time, ovaries were also dissected for Fluorescent *In Situ* Hybridization (FISH) in  
400 sterile PBS buffer, and then immediately transferred to a tube containing Carnoy's fixative  
401 (chloroform:ethanol:acetic acid, 6:3:1) and fixed at 4°C overnight. Samples were then rinsed  
402 in PBS and incubated in a hybridization buffer containing: 50% formamide, 25% 20xSSC,  
403 0.2% (w/v) Dextran Sulphate, 2.5% Herring Sperm DNA, 1% (w/v) tRNA, 0.015% (w/v) DTT,  
404 1% Denhardt's solution, and 100 ng/ml of each probe. The probes annealed on the *wsp* gene(5).  
405 Samples were left to hybridize overnight in a dark-humid box at 37°C. Samples were washed  
406 twice in a solution containing: 5% 20xSSC, 0.015% (w/v) DTT, and twice in a solution of 2.5%  
407 SSC, 0.015% (w/v) DTT in dH<sub>2</sub>O, and incubated at 55°C for 20 minutes. Samples were then  
408 placed on a slide containing a drop of VECTASHIELD Antifade Mounting Medium with DAPI  
409 (Vector Laboratories, California, USA) and were visualized immediately using a confocal  
410 microscope (ZEISS, Germany)

411

#### 412 *Wolbachia* recovery during adult stage

413 After larval treatments, named control (C) and heat-treated (HT), 8 females from different  
414 experimental groups denoted as larval-treatment/adult-treatment as follows: control/control;  
415 control/shaded; control/semi-shaded; heat/control; heat/shaded; heat/semi-shaded, were

416 sampled after 0, 7 and 14 days. Midguts and salivary glands were also dissected a few hours  
417 after eclosion (day 0) and after 14 days. *Wolbachia* density was assessed in whole mosquitoes  
418 and tissues by qPCR as previously described.

419

#### 420 Maternal transmission

421 Maternal transmission of each *Wolbachia* strain after heat stress was evaluated by backcrossing  
422 heat-treated females with heat-treated wild-type males, while control females mated with  
423 control wild-type males. After offering a blood-meal, 10 engorged females per group were  
424 selected and, after 3 days, individualized on damp circle of filter paper inside up-turned plastic  
425 cups. Filter papers were collected and individually desiccated. Once dried, eggs were hatched  
426 in containers and reared at stable control temperature; 6-10 4th-instar larvae were randomly  
427 sampled from each individualized female (10 females) and assessed for *Wolbachia* infection  
428 by PCR, using strain specific primers described in Table S1. PCR reactions were set up using  
429 1x Taqmaster mix (Vazyme) according to the manufacture's protocol; the amplification  
430 reaction consisted of a cycle at 94 °C for 3 min, followed by 30 cycles of denaturation at 94 °C  
431 for 30 s, annealing at 55 °C for 30 s, extension at 72 °C for 30s, and a final step at 72 °C for  
432 10 min. Additionally, a subset of samples (6 individuals for 6 family) were validated by qPCR,  
433 using *wsp* general primers.

434

#### 435 Virus challenge

436 5 days-old females per group were fed an infectious blood-meal consisting of human blood and  
437 DENV serotype-2 virus (New Guinea C Strain). The virus was serially passaged  
438 in *Ae. albopictus* C6/36 cells: the infected supernatant was harvested, concentrated  
439 using Amicon Ultra-15 filters (Millipore, IRL) and titered *via* fluorescent focus assay (FFA),

440 as described below. Two independent challenges were carried out, using the same batch of  
441 propagated virus at the final concentration in the blood of  $1.7 \times 10^7$  FFU/ml. Control and heat-  
442 treated females were infected during the first virus challenge, while the second infectious  
443 feeding involved only heat-treated individuals. Fully engorged females were transferred in a  
444 climatic chamber at 27°C, 70% relative humidity and a 12-hour light/dark cycle, and  
445 maintained with 5% sucrose solution. After 12 days, mosquitoes were dissected and sampled:  
446 for the first replicate head thoraxes of control and heat-treated females were used to quantify  
447 virus titres, while salivary glands from heat-treated females were used for the second replicate.  
448 Samples were transferred in Dulbecco's Modified Eagle Medium (DMEM) medium  
449 supplemented with 2% fetal bovine serum (FBS), After being homogenized, 10-fold serial  
450 dilutions ( $10^{-1}$  to  $10^{-3}$ ) of the each solution were transferred onto a monolayer of Vero cells for  
451 viral quantification with fluorescent focus assay (FFA). Primary antibody for DENV was  
452 MAB8705 Anti-dengue virus complex antibody (Millipore); secondary antibody was the Goat  
453 anti-mouse Alexa Fluor 488, A-11001 (Thermo Scientific, Waltham, Massachusetts, USA).  
454 Celigo Imaging Cytometer (Nexcelom Bioscience, Lawrence, Massachusetts) was used for  
455 imaging plates. Fluorescent foci were counted by eye (from dilutions with less than 100 foci)  
456 and virus titers calculated and expressed as FFU/mL.

457

#### 458 Statistical analysis

459 Graphics were generated using the 'ggplot2' package of R Studio (RStudio Inc., Boston,  
460 Massachusetts, USA) of the R software (version 3.6.1) and Prism Software (version 8.4.3) .  
461 All statistical analyses were run using Prism version 8. Shapiro-Wilk Test was used for  
462 assessing normality distribution of data, and parametric and non-parametric tests were selected  
463 accordingly. Analysis of virus-challenged mosquitoes was performed using a non-parametric

464 Mann-Whitney Test between viral titres and Fisher's Exact Test for comparing rates of positive  
465 and negative samples.

466  
467 **Acknowledgments**

468 We thank Ghazali M. R. Kamarul, Institute for Medical Research, Malaysia, for providing  
469 the temperature readings from Kuala Lumpur and Ary Hoffmann, University of Melbourne for  
470 comments on the manuscript.

471

472 **References**

- 473 1. Ross PA, Callahan AG, Yang Q, Jasper M, Arif MAK, Afizah AN, et al. An elusive  
474 endosymbiont: Does *Wolbachia* occur naturally in *Aedes aegypti*? *Ecol Evol.* 2020;10(3):1581-  
475 91.
- 476 2. Walker T, Johnson PH, Moreira LA, Iturbe-Ormaetxe I, Frentiu FD, McMeniman CJ, et  
477 al. The *wMel* *Wolbachia* strain blocks dengue and invades caged *Aedes aegypti* populations.  
478 *Nature.* 2011;476(7361):450-3.
- 479 3. Bian G, Xu Y, Lu P, Xie Y, Xi Z. The endosymbiotic bacterium *Wolbachia* induces  
480 resistance to dengue virus in *Aedes aegypti*. *PLoS Pathog.* 2010;6(4):e1000833.
- 481 4. Hoffmann AA, Ross PA, Rašić G. *Wolbachia* strains for disease control: ecological and  
482 evolutionary considerations. *Evol Appl.* 2015;8(8):751-68.
- 483 5. Moreira LA, Iturbe-Ormaetxe I, Jeffery JA, Lu G, Pyke AT, Hedges LM, et al. A  
484 *Wolbachia* symbiont in *Aedes aegypti* limits infection with dengue, Chikungunya, and  
485 *Plasmodium*. *Cell.* 2009;139(7):1268-78.
- 486 6. Tan CH, Wong PJ, Li MI, Yang H, Ng LC, O'Neill SL. *wMel* limits zika and chikungunya  
487 virus infection in a Singapore *Wolbachia*-introgressed *Ae. aegypti* strain, *wMel-Sg*. *PLoS Negl*  
488 *Trop Dis.* 2017;11(5):e0005496.
- 489 7. Ant TH, Herd CS, Geoghegan V, Hoffmann AA, Sinkins SP. The *Wolbachia* strain *wAu*  
490 provides highly efficient virus transmission blocking in *Aedes aegypti*. *PLoS Pathog.*  
491 2018;14(1):e1006815.
- 492 8. Nazni WA, Hoffmann AA, NoorAfizah A, Cheong YL, Mancini MV, Golding N, et al.  
493 Establishment of *Wolbachia* Strain *wAlbB* in Malaysian Populations of *Aedes aegypti* for  
494 Dengue Control. *Curr Biol.* 2019;29(24):4241-8 e5.
- 495 9. Ryan PA, Turley AP, Wilson G, Hurst TP, Retzki K, Brown-Kenyon J, et al. Establishment  
496 of *wMel* *Wolbachia* in *Aedes aegypti* mosquitoes and reduction of local dengue transmission  
497 in Cairns and surrounding locations in northern Queensland, Australia. *Gates Open Res.*  
498 2019;3:1547.
- 499 10. Tantowijoyo W, Andari B, Arguni E, Budiwati N, Nurhayati I, Fitriana I, et al. Stable  
500 establishment of *wMel* *Wolbachia* in *Aedes aegypti* populations in Yogyakarta, Indonesia.  
501 *PLoS Negl Trop Dis.* 2020;14(4):e0008157.
- 502 11. Joubert DA, Walker T, Carrington LB, De Bruyne JT, Kien DH, Hoang Nle T, et al.  
503 Establishment of a *Wolbachia* Superinfection in *Aedes aegypti* Mosquitoes as a Potential  
504 Approach for Future Resistance Management. *PLoS Pathog.* 2016;12(2):e1005434.
- 505 12. Fraser JE, De Bruyne JT, Iturbe-Ormaetxe I, Stepnell J, Burns RL, Flores HA, et al. Novel  
506 *Wolbachia*-transinfected *Aedes aegypti* mosquitoes possess diverse fitness and vector  
507 competence phenotypes. *PLoS Pathog.* 2017;13(12):e1006751.
- 508 13. Teixeira L, Ferreira A, Ashburner M. The bacterial symbiont *Wolbachia* induces  
509 resistance to RNA viral infections in *Drosophila melanogaster*. *PLoS Biol.* 2008;6(12):e2.
- 510 14. Hedges LM, Brownlie JC, O'Neill SL, Johnson KN. *Wolbachia* and virus protection in  
511 insects. *Science.* 2008;322(5902):702.
- 512 15. Dutra HL, Rocha MN, Dias FB, Mansur SB, Caragata EP, Moreira LA. *Wolbachia* Blocks  
513 Currently Circulating Zika Virus Isolates in Brazilian *Aedes aegypti* Mosquitoes. *Cell Host*  
514 *Microbe.* 2016;19(6):771-4.
- 515 16. O'Neill SL, Ryan PA, Turley AP, Wilson G, Retzki K, Iturbe-Ormaetxe I, et al. Scaled  
516 deployment of *Wolbachia* to protect the community from dengue and other *Aedes*  
517 transmitted arboviruses. *Gates Open Res.* 2018;2:36.

- 518 17. Indriani C, Tantowijoyo W, Rancès E, Andari B, Prabowo E, Yusdi D, et al. Reduced  
519 dengue incidence following deployments of. *Gates Open Res.* 2020;4:50.
- 520 18. Ekwudu O, Devine GJ, Aaskov JG, Frentiu FD. *Wolbachia* strain wAlbB blocks  
521 replication of flaviviruses and alphaviruses in mosquito cell culture. *Parasit Vectors.*  
522 2020;13(1):54.
- 523 19. Martinez J, Longdon B, Bauer S, Chan YS, Miller WJ, Bourtzis K, et al. Symbionts  
524 commonly provide broad spectrum resistance to viruses in insects: a comparative analysis of  
525 *Wolbachia* strains. *PLoS Pathog.* 2014;10(9):e1004369.
- 526 20. Lu P, Bian G, Pan X, Xi Z. *Wolbachia* induces density-dependent inhibition to dengue  
527 virus in mosquito cells. *PLoS Negl Trop Dis.* 2012;6(7):e1754.
- 528 21. McMeniman CJ, Lane RV, Cass BN, Fong AW, Sidhu M, Wang YF, et al. Stable  
529 introduction of a life-shortening *Wolbachia* infection into the mosquito *Aedes aegypti*.  
530 *Science.* 2009;323(5910):141-4.
- 531 22. Min KT, Benzer S. *Wolbachia*, normally a symbiont of *Drosophila*, can be virulent,  
532 causing degeneration and early death. *Proc Natl Acad Sci U S A.* 1997;94(20):10792-6.
- 533 23. Fraser JE, O'Donnell TB, Duyvestyn JM, O'Neill SL, Simmons CP, Flores HA. Novel  
534 phenotype of *Wolbachia* strain wPip in *Aedes aegypti* challenges assumptions on mechanisms  
535 of *Wolbachia*-mediated dengue virus inhibition. *PLoS Pathog.* 2020;16(7):e1008410.
- 536 24. Axford JK, Ross PA, Yeap HL, Callahan AG, Hoffmann AA. Fitness of wAlbB *Wolbachia*  
537 Infection in *Aedes aegypti*: Parameter Estimates in an Outcrossed Background and Potential  
538 for Population Invasion. *Am J Trop Med Hyg.* 2016;94(3):507-16.
- 539 25. Hancock PA, White VL, Ritchie SA, Hoffmann AA, Godfray HC. Predicting *Wolbachia*  
540 invasion dynamics in *Aedes aegypti* populations using models of density-dependent  
541 demographic traits. *BMC Biol.* 2016;14(1):96.
- 542 26. Barton NH, Turelli M. Spatial waves of advance with bistable dynamics: cytoplasmic  
543 and genetic analogues of Allee effects. *Am Nat.* 2011;178(3):E48-75.
- 544 27. Nguyen TH, Nguyen HL, Nguyen TY, Vu SN, Tran ND, Le TN, et al. Field evaluation of  
545 the establishment potential of wMelPop *Wolbachia* in Australia and Vietnam for dengue  
546 control. *Parasit Vectors.* 2015;8:563.
- 547 28. Wernegreen JJ. Mutualism meltdown in insects: bacteria constrain thermal  
548 adaptation. *Curr Opin Microbiol.* 2012;15(3):255-62.
- 549 29. Sazama EJ, Ouellette SP, Wesner JS. Bacterial Endosymbionts Are Common Among,  
550 but not Necessarily Within, Insect Species. *Environ Entomol.* 2019;48(1):127-33.
- 551 30. Sumi T, Miura K, Miyatake T. *Wolbachia* density changes seasonally amongst  
552 populations of the pale grass blue butterfly, *Zizeeria maha* (Lepidoptera: Lycaenidae). *PLoS*  
553 *One.* 2017;12(4):e0175373.
- 554 31. Ross PA, Wiwatanaratnabutr I, Axford JK, White VL, Endersby-Harshman NM,  
555 Hoffmann AA. *Wolbachia* Infections in *Aedes aegypti* Differ Markedly in Their Response to  
556 Cyclical Heat Stress. *PLoS Pathog.* 2017;13(1):e1006006.
- 557 32. Ulrich JN, Beier JC, Devine GJ, Hugo LE. Heat Sensitivity of wMel *Wolbachia* during  
558 *Aedes aegypti* Development. *PLoS Negl Trop Dis.* 2016;10(7):e0004873.
- 559 33. Hemme RR, Tank JL, Chadee DD, Severson DW. Environmental conditions in water  
560 storage drums and influences on *Aedes aegypti* in Trinidad, West Indies. *Acta Trop.*  
561 2009;112(1):59-66.
- 562 34. Ross PA, Hoffmann AA. Continued Susceptibility of the wMel *Wolbachia* Infection in  
563 *Aedes aegypti* to Heat Stress Following Field Deployment and Selection. *Insects.* 2018;9(3).

- 564 35. K. P. Paaijmans AFGJ, W. Takken, B. G. Heusinkveld, A. K. Githeko, M. Dicke and  
565 A. A. M. Holtslag. Observations and model estimates of diurnal water temperature dynamics  
566 in mosquito breeding sites in western Kenya. *Hydr Process*; 2008;22(4789–801).
- 567 36. Nainu F, Trenerry A, Johnson KN. *Wolbachia*-mediated antiviral protection is cell-  
568 autonomous. *J Gen Virol*. 2019;100(11):1587-92.
- 569 37. Cattarino L, Rodriguez-Barraquer I, Imai N, Cummings DAT, Ferguson NM. Mapping  
570 global variation in dengue transmission intensity. *Sci Transl Med*. 2020;12(528).
- 571 38. Geoghegan V, Stainton K, Rainey SM, Ant TH, Dowle AA, Larson T, et al. Perturbed  
572 cholesterol and vesicular trafficking associated with dengue blocking in *Wolbachia*-infected  
573 *Aedes aegypti* cells. *Nat Commun*. 2017;8(1):526.
- 574 39. Schmidt TL, Barton NH, Rašić G, Turley AP, Montgomery BL, Iturbe-Ormaetxe I, et al.  
575 Local introduction and heterogeneous spatial spread of dengue-suppressing *Wolbachia*  
576 through an urban population of *Aedes aegypti*. *PLoS Biol*. 2017;15(5):e2001894.
- 577 40. Garcia GA, Sylvestre G, Aguiar R, da Costa GB, Martins AJ, Lima JBP, et al. Matching  
578 the genetics of released and local *Aedes aegypti* populations is critical to assure *Wolbachia*  
579 invasion. *PLoS Negl Trop Dis*. 2019;13(1):e0007023.
- 580 41. Carrington LB, Tran BCN, Le NTH, Luong TTH, Nguyen TT, Nguyen PT, et al. Field- and  
581 clinically derived estimates of *Wolbachia*-mediated blocking of dengue virus transmission  
582 potential in *Aedes aegypti* mosquitoes. *Proc Natl Acad Sci U S A*. 2018;115(2):361-6.
- 583 42. Ye YH, Carrasco AM, Dong Y, Sgrò CM, McGraw EA. The Effect of Temperature on  
584 *Wolbachia*-Mediated Dengue Virus Blocking in *Aedes aegypti*. *Am J Trop Med Hyg*.  
585 2016;94(4):812-9.
- 586 43. Ross PA, Axford JK, Yang Q, Staunton KM, Ritchie SA, Richardson KM, et al. Heatwaves  
587 cause fluctuations in *wMel Wolbachia* densities and frequencies in *Aedes aegypti*. *PLoS Negl*  
588 *Trop Dis*. 2020;14(1):e0007958.
- 589 44. Ewa Chrostek NM, Marta S Marialva , Luis Teixeira. *Wolbachia* -conferred  
590 antiviral protection is determined by developmental temperature.  
591 bioRxiv 2020.06.24.169169: bioRxiv; 2020.
- 592 45. Reinhold JM, Lazzari CR, Lahondère C. Effects of the Environmental Temperature on  
593 *Aedes aegypti* and *Aedes albopictus* mosquitoes: a review. *Insects*. 2018;9(4).
- 594 46. Braig HR, Zhou W, Dobson SL, O'Neill SL. Cloning and characterization of a gene  
595 encoding the major surface protein of the bacterial endosymbiont *Wolbachia pipientis*. *J*  
596 *Bacteriol*. 1998;180(9):2373-8.
- 597



598 **Figures**

599

600

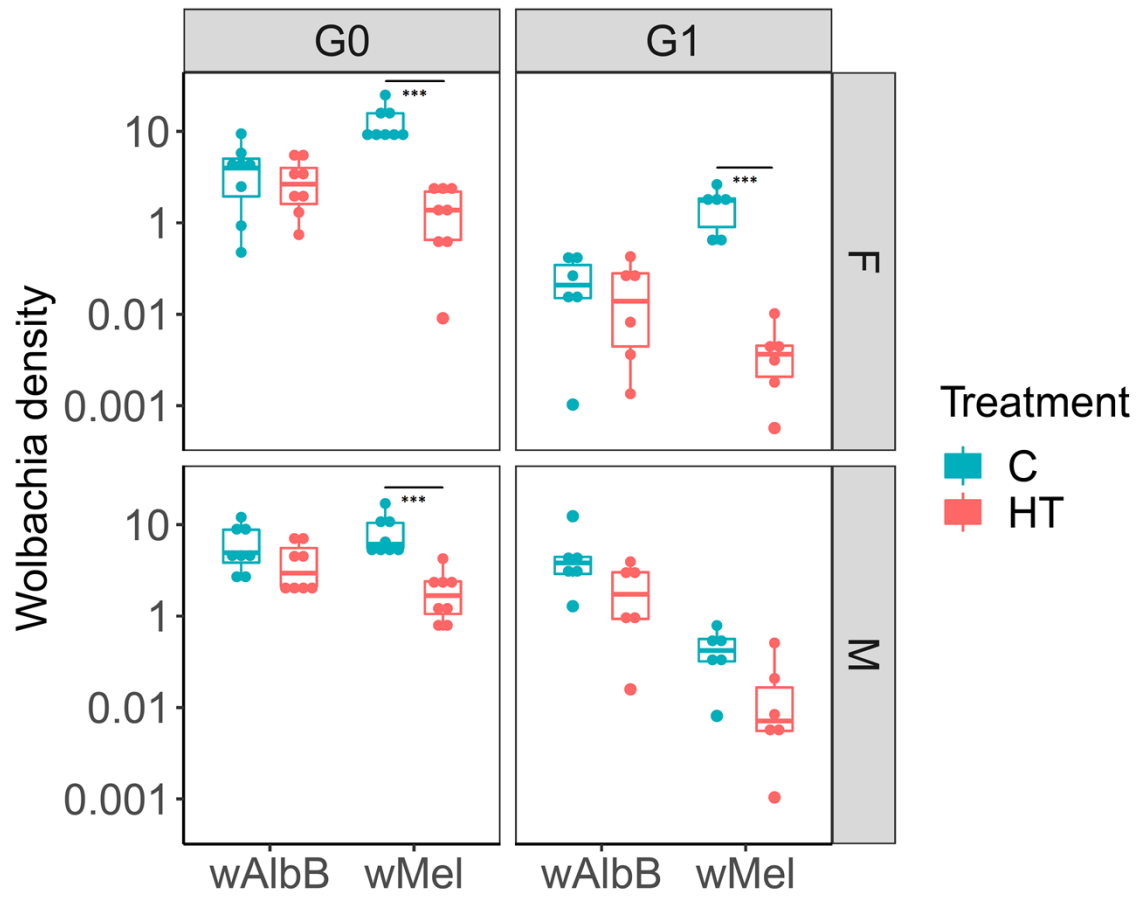

601

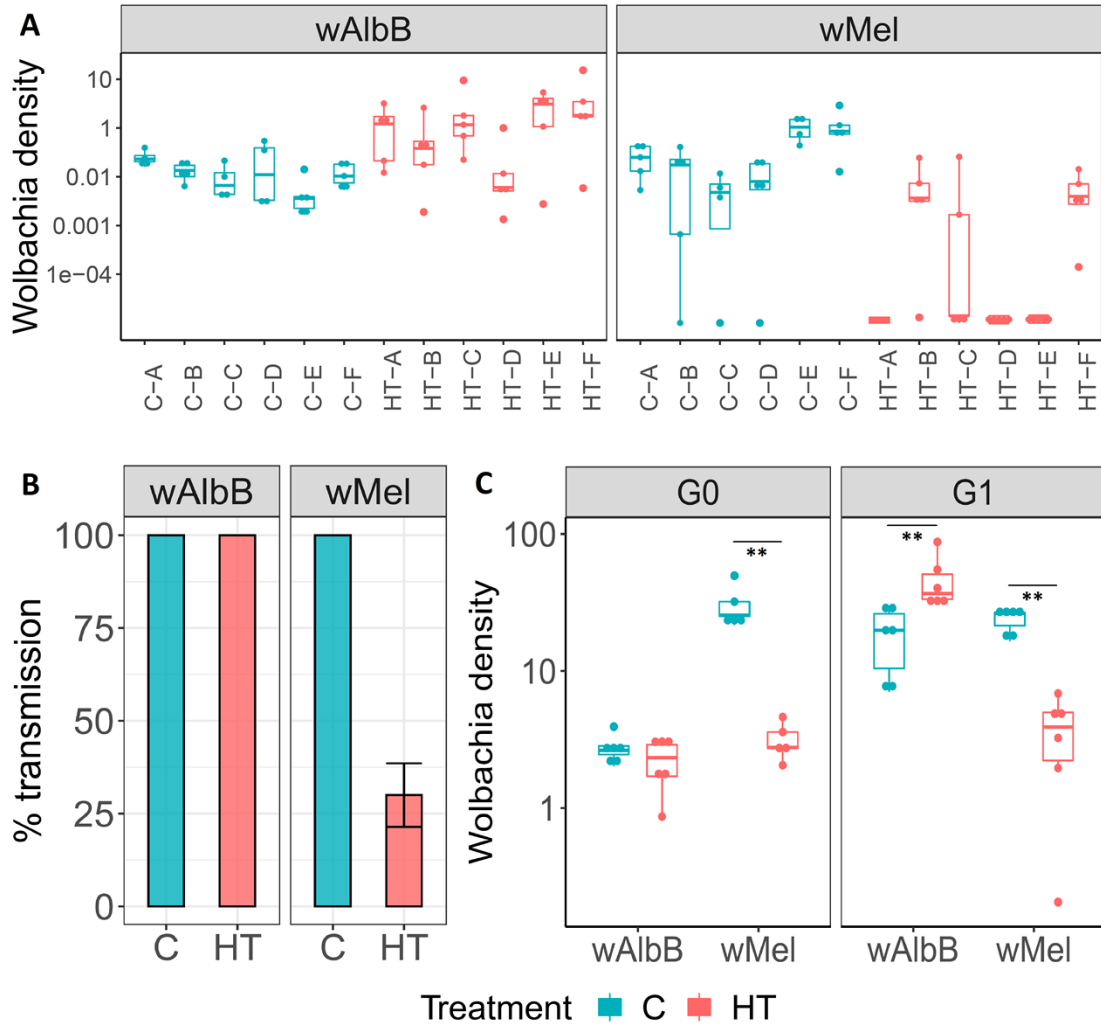



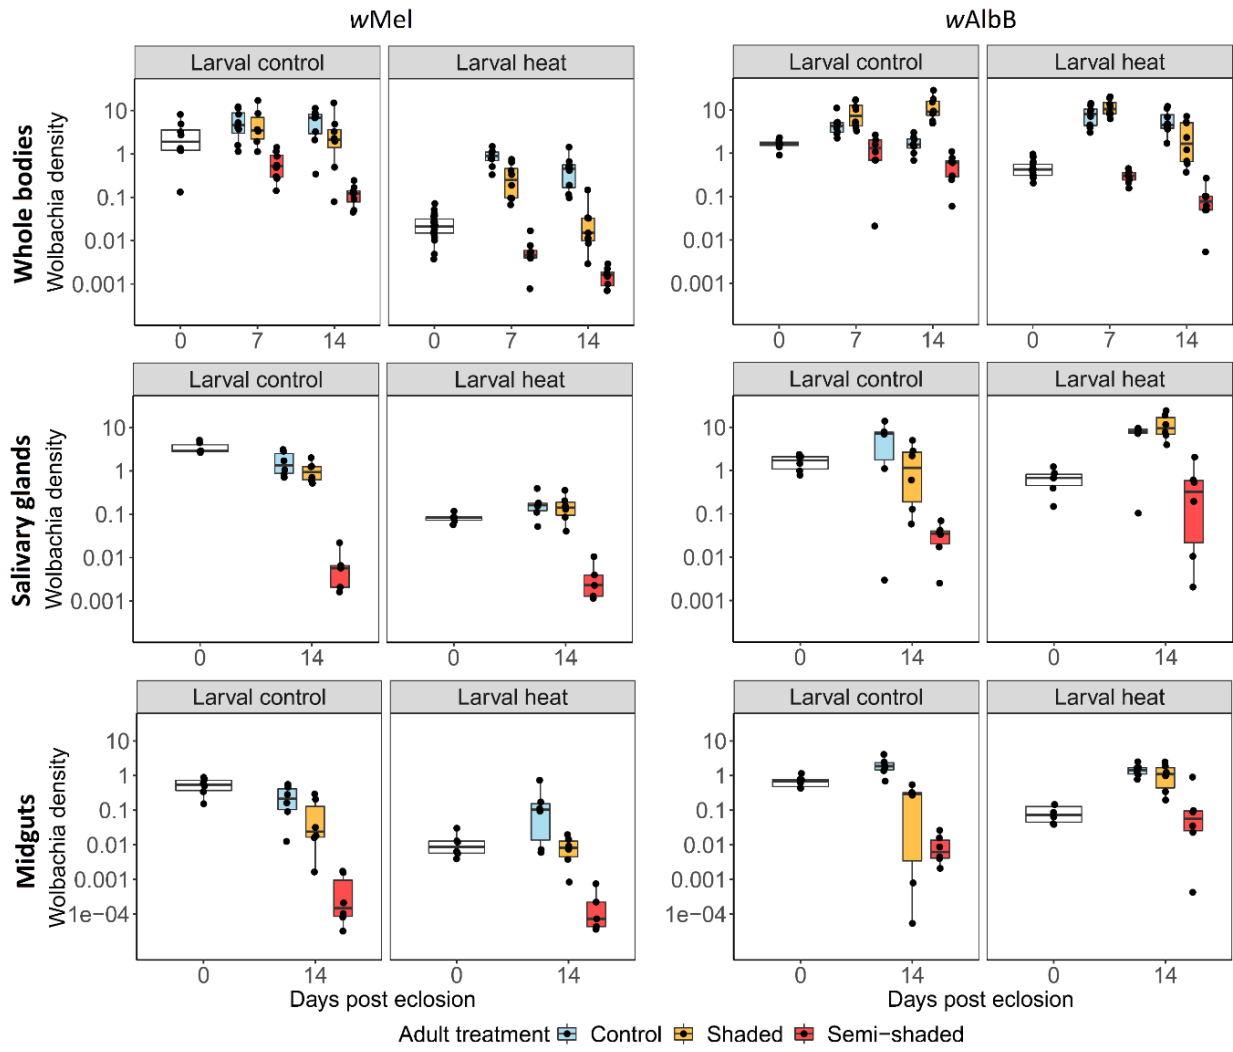

604

605

606 **S1 Figure. Simulated larval, shaded and semi-shaded temperature cycles (A)** A  
607 representative 24-hour period of the simulated tropical water-temperature cycle generated from  
608 data from water drums known to act as *Ae. aegypti* larvae breeding sites in Trinidad (33). Data  
609 collected using a water-proof temperature probe placed in a volume of water equal to that of  
610 the larval pans, and left in a dynamic temperature incubator. 24-hour period shaded (B) and  
611 semi-shaded (C) cycles for adult temperatures generated from data collected in urban Kuala  
612 Lumpur. Readings are from a temperature probe placed in a dynamic temperature incubator  
613 running the replica cycle.

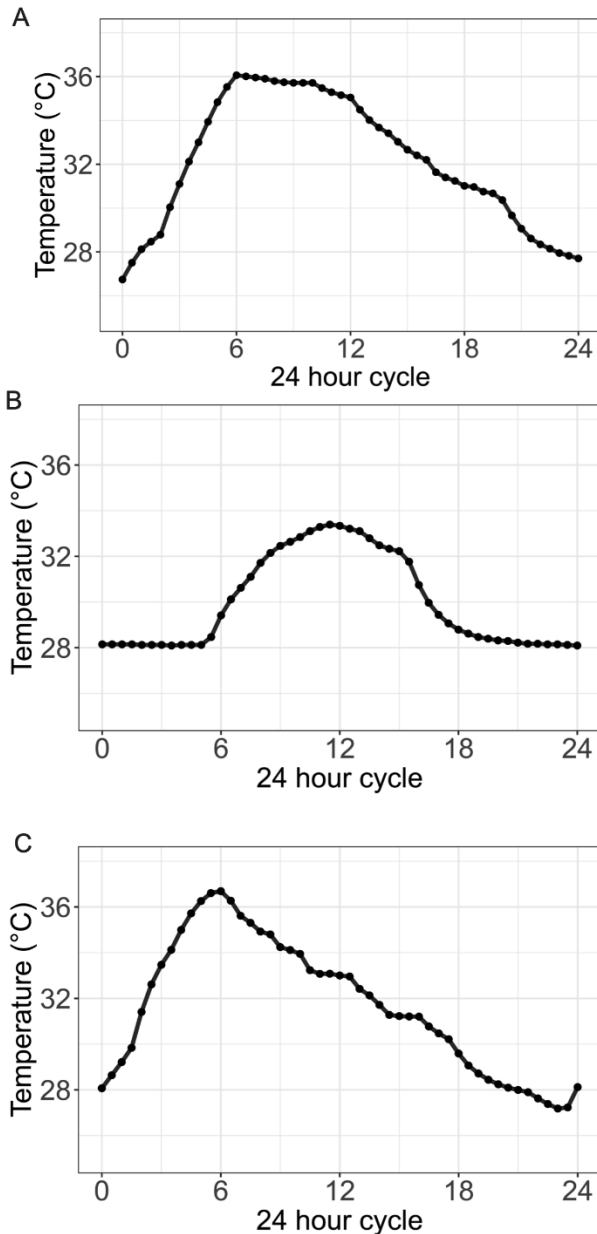

614  
615  
616  
617  
618

619 **S2 Figure. Fluorescent *in situ* hybridization.** Visualization of distributions and density  
620 reductions of *Wolbachia* (green) in ovaries of 5-days old females from *w*Mel, *w*AlbB and wild-  
621 type *Ae. aegypti* females from control and heat-treated groups. Blue stain is DAPI.

622

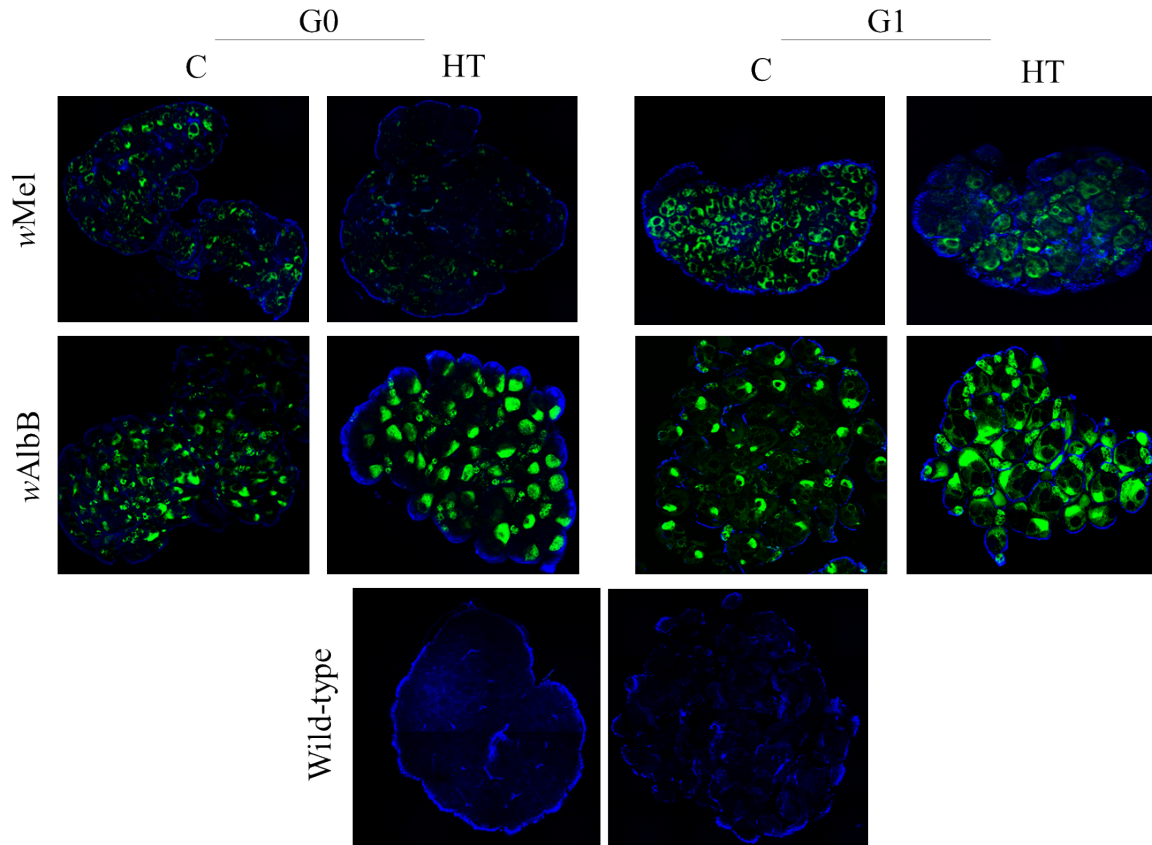

623

624

625

626

| <b>Primer name</b>      | <b>5'-3' Sequence</b>                      |
|-------------------------|--------------------------------------------|
| <i>wAlbB-F (7)</i>      | GCAATACCTATGCCGTTTA                        |
| <i>wAlbB-R (7)</i>      | GACGAAGGGGATAGGTTAATATC                    |
| <i>wMel-F (7)</i>       | TATTGAGCCTTCCTCGTACC                       |
| <i>wMel-R(29)</i>       | TAGCATGCCGTTTTTCTGTA                       |
| <i>qHTH-F (46)</i>      | TGGTCCTATATTGGCGAGCTA                      |
| <i>qHTH-R (46)</i>      | TCGTTTTTGCAAGAAGGTCA                       |
| <i>qWSP-F (5)</i>       | ATCTTTTATAGCTGGTGGTGGT                     |
| <i>qWSP-R (46)</i>      | GGAGTGATAGGCATATCTTCAAT                    |
| <i>wsp</i> probe W2(5)  | CTTCTGTGAGTACCGTCATTATC-(Alexa Fluor 488)  |
| <i>wsp</i> probe W3 (5) | AACCGACCCTATCCCTTCGAATA-( Alexa Fluor 488) |

627

628

629

S1 Table : List of sequences of oligonucleotides and probes.

630  
631  
632

|                  | <b>Treatment</b>   | <b>Tissue</b>   | <b>N</b> | <b>Dissemination rate (%)</b> |
|------------------|--------------------|-----------------|----------|-------------------------------|
| <b>wAlbB</b>     | Heat- treated (HT) | Head and thorax | 24       | 12.5%                         |
|                  |                    | Salivary glands | 49       | 8.1%                          |
|                  | Control (C)        | Head and thorax | 24       | 0.0%                          |
| <b>wMel</b>      | Heat- treated      | Head and thorax | 24       | 33.3%                         |
|                  |                    | Salivary glands | 50       | 42%                           |
|                  | Control            | Head and thorax | 24       | 4.1%                          |
| <b>wild-type</b> | Heat- treated      | Head and thorax | 24       | 58.3%                         |
|                  |                    | Salivary glands | 46       | 23.9%                         |
|                  | Control            | Head and thorax | 24       | 33.3%                         |

633  
634  
635  
636  
637  
638  
639  
640  
641  
642  
643  
644  
645  
646  
647  
648  
649  
650  
651  
652  
653

S2 Table: Summary of DENV-2 challenge data



|                        |              |              | <b>Fisher's Exact Test<br/>(Dissemination Rate)</b> | <b>Mann-Whitney Test<br/>(Virus Titre)</b> |
|------------------------|--------------|--------------|-----------------------------------------------------|--------------------------------------------|
| <b>Head and thorax</b> | Wild-type C  | Wild-type HT | ns, $p=0.14$                                        | ns, $p=0.05$<br>U=203.5                    |
|                        | wAlbB C      | wAlbB HT     | ns, $p=0.23$                                        | ns, $p=0.23$<br>U=252                      |
|                        | wMel C       | wMel HT      | $*$ , $p=0.02$                                      | $*$ , $p=0.01$<br>U=202                    |
|                        | Wild-type C  | wAlbB C      | $**$ , $p=0.003$                                    | $**$ , $p=0.003$<br>U=192                  |
|                        | Wild-type C  | wMel C       | $*$ , $p=0.02$                                      | $**$ , $p=0.003$<br>U=200                  |
|                        | Wild-type HT | wAlbB HT     | $**$ , $p=0.002$                                    | $***$ , $p=0.0004$<br>U=145                |
|                        | Wild-type HT | wMel HT      | ns, $p=0.14$                                        | $*$ , $p=0.03$<br>U=193.5                  |
|                        | wAlbB C      | wMel C       | ns, $p>0.9$                                         | ns, $p>0.9$<br>U=276                       |
|                        | wAlbB HT     | wMel HT      | ns, $p=0.16$                                        | $p=0.01$<br>U= 202                         |
| <b>Salivary glands</b> | Wild-type HT | wAlbB HT     | $*$ , $p=0.04$                                      | $**$ , $p=0.006$<br>U=1028                 |
|                        | Wild-type HT | wMel HT      | ns, $p=0.083$                                       | ns, $p=0.27$<br>U=1136                     |
|                        | wAlbB HT     | wMel HT      | $p=0.0001$                                          | $p<0.0001$<br>U=1229                       |

654  
655  
656  
657  
658  
659  
660  
661  
662  
663  
664  
665  
666  
667  
668  
669  
670  
671  
672  
673  
674

S3 Table: Statistical comparisons between groups and conditions after DENV2 challenge.

675 **Figure 1. *Wolbachia* density in whole-bodies of control (C, constant 27°C) and heat-**  
676 **treated (HT, temp min= 28°C; temp max= 36°C).** The densities of *wAlbB* and *wMel* were  
677 quantified by qPCR on 5-days-old females (F) and males (M) over two generations of heat-  
678 treatment. Boxplots represent 6 biological replicates. Central line indicates the median of  
679 densities and whiskers represent upper and lower extremes. A Mann-Whitney test was used for  
680 statistical analyses.

681

682 **Figure 2. Whole-body densities, maternal transmission rate and ovary-specific densities**  
683 **of *wAlbB* and *wMel* in control (C, constant 27°C) and heat-treated (HT, temp min=28°C;**  
684 **temp max 36°C) mosquitoes. (A)** Progeny from single females reared as larvae under control  
685 or high temperature conditions were hatched in families and reared at 27°C. 6 L4 larvae were  
686 randomly sampled from each individualized female and assessed for *Wolbachia* density by  
687 qPCR (A) and infection-status by strain-specific PCR (B) (N=60 for each treatment/strain). (C)  
688 Densities of *wAlbB* and *wMel* were measured in 6 pools of 3 sets of dissected ovaries. The  
689 centre of the box-plots indicates the median of densities and whiskers represent upper and  
690 lower extremes. A Mann-Whitney test was used for statistical analyses.

691

692 **Figure 3. Effect of larval heat-treatment on dengue inhibition.** Wild-type, *wAlbB*- and  
693 *wMel*-carrying females were fed on DENV2-infected blood-meal. Engorged females were  
694 selected and incubated for 12 days. Heads and thoraxes from control (A) and heat-treated  
695 females (C) were assessed for virus dissemination by Fluorescent Focus Assay (FFA). Viral  
696 titer was also assessed on salivary glands of heat-treated females from an independent viral  
697 challenge (E). Dots represent the number of foci/ml and each dot corresponds to a single  
698 mosquito. Dissemination rates from the same experiments are represented in panels B, D and  
699 F. Statistical analysis was performed using Mann-Whitey Test and Fisher's Exact Test. See  
700 Table S2 for statistical comparisons.

701

702 **Figure 4. Effects of high temperature larval and adult ambient air temperatures on *wMel***  
703 **and *wAlbB* densities in whole-bodies, salivary-gland and midgut tissues.** Larvae were  
704 reared under control (larval control, constant 27°C) and high temperature (larval heat, temp  
705 min= 27°C; temp max 37°C) conditions. A subset of females were sampled immediately on  
706 eclosion (day 0), and densities assessed. The remaining females were divided into three adult  
707 treatment temperatures: control (constant 27°C), shaded (temp min = 28°C; temp max =  
708 33.5°C), and semi-shaded (temp min = 27°C; temp max = 36.5°C). Adults were sampled and  
709 densities assessed in whole bodies (days 7 and 14 post eclosion) and dissected salivary gland  
710 and midgut tissues (day 14 post eclosion). Data points represent single whole adult females, or  
711 pools of three salivary glands or midguts.

712

713

714
